1 **Western Kenyan *Anopheles gambiae* s.s. showing intense permethrin resistance**  
2 **harbor distinct microbiota**

3 Diana Omoke<sup>1,2</sup>, Mathew Kipsum<sup>2</sup>, Samson Otieno<sup>2</sup>, Edward Esalimba<sup>2</sup>, Mili Sheth<sup>3</sup>,  
4 Audrey Lenhart<sup>4</sup>, Ezekiel Mugendi Njeru<sup>1</sup>, Eric Ochomo<sup>2</sup>, and Nsa Dada<sup>5,6\*</sup>

5 <sup>1</sup>Department of Biochemistry, Microbiology and Biotechnology, Kenyatta University, Nairobi,  
6 Kenya.

7 <sup>2</sup>Entomology section, Center for Global Health Research, Kenya Medical Research  
8 Institute, Kisumu, Kenya.

9 <sup>3</sup>Biotechnology Core Facility Branch, Division of Scientific Resources, National Center  
10 for Emerging & Zoonotic Infectious Diseases, Centers for Disease Control and  
11 Prevention, Atlanta, GA, United States of America

12 <sup>4</sup>Entomology Branch, Division of Parasitic Diseases and Malaria, Center for Global  
13 Health, Centers for Diseases Control and Prevention, Atlanta, GA, United States of  
14 America

15 <sup>5</sup>Faculty of Science and Technology, Norwegian University of Life Science, Aas, Norway.

16 <sup>6</sup>Public Health and Epidemiology Department, Nigerian Institute of Medical Research  
17

18 \* Address correspondence to Nsa Dada: [nsa.dada@mbu.no](mailto:nsa.dada@mbu.no) or [nsadada@yahoo.com](mailto:nsadada@yahoo.com)

19 **Abstract**

20 **Background:** Insecticide resistance poses a growing challenge to malaria vector control in  
21 Kenya and around the world. Following evidence of associations between the mosquito  
22 microbiota and insecticide resistance, we comparatively characterized the microbiota of *An.*  
23 *gambiae s.s.* from Tulukuyi village, Bungoma, Kenya, with differing permethrin resistance  
24 profiles.

25 **Methods:** Using the CDC bottle bioassay, 133 2-3 day-old, virgin, non-blood fed female F<sub>1</sub>  
26 progeny of field-caught *An. gambiae s.s.* were exposed to five times (107.5µg/ml) the  
27 discriminating dose of permethrin. Post bioassay, 50 resistant and 50 susceptible mosquitoes  
28 were subsequently screened for *kdr* East and West mutations, and individually processed for  
29 microbial analysis using high throughput sequencing targeting the universal bacterial and  
30 archaeal 16S rRNA gene.

31 **Results:** 47% of the samples tested (n=133) were resistant, and of the 100 selected for further  
32 processing, 99% were positive for *kdr* East and 1% for *kdr* West. Overall, 84 bacterial taxa were  
33 detected across all mosquito samples, with 36 of these shared between resistant and susceptible  
34 mosquitoes. A total of 20 were unique to the resistant mosquitoes and 28 were unique to the  
35 susceptible mosquitoes. There were significant differences in bacterial composition between  
36 resistant and susceptible individuals (F=2.33, P=0.001), with presence of *Sphingobacterium*,  
37 *Lysinibacillus* and *Streptococcus* (all known pyrethroid-degrading taxa), and the radiotolerant  
38 *Rubrobacter*, being significantly associated with resistant mosquitoes. On the other hand, the  
39 presence of *Myxococcus*, was significantly associated with susceptible mosquitoes.

40 **Conclusion:** This is the first report of distinct microbiota in *An. gambiae s.s.* associated with  
41 intense pyrethroid resistance. The findings highlight differentially abundant bacterial taxa  
42 between resistant and susceptible mosquitoes, and further suggest a microbe-mediated  
43 mechanism of insecticide resistance in mosquitoes. Our results also indicate fixation of the *kdr*  
44 East mutation in this mosquito population, precluding further analysis of its associations with the  
45 mosquito microbiota, but presenting the hypothesis that any microbe-mediated mechanism of  
46 insecticide resistance would be likely of a metabolic nature. Overall, this study lays initial  
47 groundwork for understanding microbe-mediated mechanisms of insecticide resistance in  
48 African malaria vectors, and potentially identifying novel microbial markers of insecticide  
49 resistance that could supplement existing vector surveillance tools.

50

51 **Key words:** Mosquito microbiota, mosquito microbiome, metabarcoding, insecticide resistance,  
52 *Anopheles gambiae s.s.*, 16S rRNA gene amplicon sequencing, pyrethroid resistance

## 53 **Background**

54 Malaria remains an important global health problem, with 92% of all deaths occurring in Africa  
55 [1]. In Kenya, more than 70% of the population is at risk of the disease, with children aged  $\leq 5$   
56 years and pregnant women being the most vulnerable to infection [2]. The use of indoor residual  
57 spraying (IRS), long-lasting insecticidal nets (LLINs) and other interventions have led to  
58 measurable improvements in preventing malaria [3]. Continued reliance on insecticide-based  
59 interventions has also resulted in widespread insecticide resistance in malaria vectors, thus  
60 threatening malaria control efforts [4, 5]. This is the case in western Kenya, where malaria vector  
61 control is increasingly being threatened by insecticide resistance due to selection pressure  
62 imposed by continued exposure to insecticides [4, 6].

63 Although insecticide resistance is increasingly prevalent [7], its underlying mechanisms are not  
64 fully understood. So far, four principal mechanisms of insecticide resistance have been described  
65 in mosquitoes, including: (i) metabolic resistance due to elevated activity of detoxification  
66 enzymes, (ii) target-site resistance due to genetic alterations at insecticide binding sites, (iii)  
67 cuticle modifications that prevent or reduce insecticide penetration, and (iv) behavioral changes  
68 resulting in avoidance of, or reduced contact with, insecticides [8]. Recent studies suggest that  
69 the mosquito microbiota may provide a fifth mechanism contributing to insecticide resistance [9,  
70 10]. Focusing largely on *Anopheles albimanus* across different geographical locations including  
71 Peru [9] and Guatemala [10], these studies have identified significant alterations of the mosquito  
72 microbiota associated with insecticide resistance, with enrichment of insecticide-degrading  
73 bacteria and enzymes in resistant mosquitoes [9].

74 The mosquito microbiota has been shown to affect mosquito physiology [11]. These microbes,  
75 which are predominantly acquired during the aquatic life stage from aquatic habitats, colonize  
76 mosquito tissues including the gut, reproductive tracts, exoskeleton, and hemocoel [12, 13].  
77 Some of these microbes are beneficial to mosquitoes through their role in nutrient provisioning,  
78 immunity and development, and subsequent contributions to mosquito fitness [12]. They also  
79 help provide protection against pathogens by modifying the host's immune system or by  
80 synthesizing specific toxins [12]. The mosquito microbiota can influence and/or be influenced by  
81 several mosquito-related factors including mosquito species, developmental stage, genetics, and  
82 sex [11]. In malaria vectors, the microbiota play important roles in malaria parasite development,  
83 survival, and sporozoite prevalence, thus modulating vector competence [14-17].

84 Recent studies on the effects of insecticide exposure on microbes associated with malaria vectors  
85 and their habitats have so far focused on *An. stephensi*, *An. albimanus* and *An. arabiensis* [9, 10,  
86 18, 19]. The microbiota of *An. gambiae s.s.* has, however, largely been unexplored in relation to  
87 insecticide resistance. Of particular importance is pyrethroid resistance—a major concern in  
88 Kenya, where this class of insecticide is predominantly used in LLINs and IRS [6, 20, 21]. To  
89 address this research gap, this study characterized and compared microbiota between pyrethroid  
90 resistant and susceptible *An. gambiae s.s.* from an area with intense pyrethroid resistance in  
91 Western Kenya. Mosquitoes were also screened for gene mutations that mediate knockdown  
92 resistance (*kdr*) to pyrethroids, in order to characterize any associations between the mosquito  
93 microbiota and *kdr* genotype. We discuss these findings on *An. gambiae s.s.*, and highlight their  
94 implications for insecticide resistance monitoring and management.

95

96 **Methods**

97 ***Mosquito collections***

98 Mosquito collections were conducted in April and May 2018 in Tulukuyi village located in  
99 Bungoma County 0.56°N 34.56°E 1427m ASL (Figure 1). Previous studies conducted by  
100 Ochomo, *et al.* [20] indicated that *An. gambiae s.s.* was the most predominant species in  
101 Bungoma and had high resistance levels to pyrethroids. Sampling was performed by aspiration of  
102 blood fed and gravid mosquitoes from 39 houses. Mosquitoes were placed in labelled paper cups  
103 with information identifying the collection date and collection site. A piece of cotton wool  
104 soaked in 10% w/v sugar solution was placed on top of the netting material covering the paper  
105 cup to sustain the collected mosquitoes. The paper cups were then placed in a cool box and  
106 transported to the laboratory.

107

**Figure 1: Map of Kenya (Right) showing Bungoma County (in expanded view) where adult mosquito collections were conducted.** Adult female *Anopheles gambiae s.s.* were collected from Tulukuyi village and F<sub>1</sub> progeny resulting from these mosquitoes were analyzed.

108

109

110 ***Generation of F<sub>1</sub> progeny from field-collected mosquitoes***

111 Prior to species identification, forced oviposition was used to generate isofemale F<sub>1</sub> progeny  
112 from field collected blood-fed and/or gravid female mosquitoes. Individual mosquitoes were  
113 placed in separate 50ml falcon tubes containing damp cotton wool topped with filter paper for  
114 egg laying. Following egg laying, each adult female was transferred into individual 1.5ml  
115 Eppendorf tubes for molecular species identification (described below). F<sub>1</sub> eggs from each

116 isofemale were removed and placed into separate clean larval trays containing distilled water for  
117 hatching, while the parents underwent species identification. Following species identification, all  
118 larvae from isofemales identified as *An. gambiae s. s.* were pooled, approximately 200 larvae per  
119 tray measuring 46cm by 35cm by 5cm and reared together. Larvae were fed a combination of  
120 ground TetraMin Baby<sup>®</sup> fish food containing Brewer's yeast (Spectrum Brands, Inc., WI), and  
121 Koi's choice premium fish food (Foster & Smith, Inc. Rhinelander, WI) at a ratio of 1:2 for *An.*  
122 *gambiae* until pupation. Using a dissecting microscope (Nikon C-PS, model no. 1071990), male  
123 and female pupae were separated within 24 hours of pupation in order to obtain virgin adult  
124 females. Female pupae were subsequently placed into cages for adult eclosion, while the males  
125 were euthanized and discarded. The resulting F<sub>1</sub> adult females (~377) were sustained on cotton  
126 balls soaked in 10% sugar solution for 2-3 days prior to insecticide susceptibility bioassays. All  
127 mosquito handling and rearing were conducted in the insectary at the Kenya Medical Research  
128 Institute -Center for Global Health Research (KEMRI-CGHR), Kisian, Kisumu, under the  
129 following conditions: temperature of  $27 \pm 2$  °C, relative humidity of  $80 \pm 10$  %, and photoperiod  
130 of 12:12 light: dark cycle.

131

### 132 ***Molecular identification of mosquito species***

133 Using the ethanol precipitation method described by Collins, *et al.* [22], genomic DNA was  
134 extracted from whole individual field-collected female mosquitoes that were used to generate the  
135 F<sub>1</sub> progeny. 2 µl of DNA from each individual, along with known *An. gambiae s.s.* DNA as  
136 positive control, were used as templates for the PCR reaction [23]. The reactions were performed  
137 using BIO-RAD thermal cycler model T100 under the following conditions: 95°C for 5 min  
138 followed by 95°C for 30 sec, 56°C for 30 sec and 72°C for 30 sec for 30 cycles, with a final

139 extension at 72°C for 5 min. Amplicons (~ 390bp for *An. gambiae s.s.*) were resolved by  
140 ethidium bromide-stained agarose gel (2%) electrophoresis.

141

## 142 ***Permethrin resistance phenotyping***

143 A total of 133 F<sub>1</sub> virgin, non-blood fed adult females aged 2-3 days were tested for permethrin  
144 resistance following the Centers for Disease Control and Prevention (CDC) guidelines for  
145 evaluating insecticide resistance [24]. The control bottle was coated with 1ml of acetone while  
146 the four test bottles were coated with 1ml of permethrin stock solution prepared with acetone, at  
147 a final concentration of 107.5µg/ml (5X the dose for discriminating permethrin resistance in  
148 *Anopheles*). *Anopheles gambiae* Kisumu susceptible strain of the same age and physiological  
149 status were used to confirm the viability of the prepared bottles—all mosquitoes in the  
150 insecticide treated bottles died, while those in the acetone-treated bottles survived. Using the F<sub>1</sub>  
151 progeny, the bioassays were conducted for 30 minutes at the end of which permethrin resistance  
152 was recorded. Mosquitoes that were alive after the bioassay were categorized as resistant and  
153 subsequently killed by freezing, while those that were dead or moribund were categorized as  
154 susceptible. Phenotyped mosquitoes were immediately placed in 1.5ml Eppendorf tubes with  
155 unique identification codes and preserved at -20°C for subsequent molecular processing.

156

## 157 **Genomic DNA isolation and molecular processing**

### 158 ***DNA isolation and purification***

159 250 µl of 70% ethanol was added to each tube of individual F<sub>1</sub> mosquitoes and vortexed at high  
160 speed for ~10 seconds to surface sterilize the mosquitoes. This was followed by a vigorous rinse,



161 then a gentle rinse with 250 µl of nuclease free water each. Genomic DNA from the whole  
162 mosquito was isolated and purified using the MasterPure™ Gram Positive DNA Purification Kit  
163 following the manufacturer's instructions (Epicentre Biotechnologies, Madison, USA). During  
164 DNA extraction, four blank controls (containing all the reagents used sans mosquito) and two 1 g  
165 soil samples from Kisian (as a distinct source of microbes) were also processed to catch any  
166 potential sample processing and cross contamination respectively. Purified DNA samples were  
167 stored at -20°C for subsequent analysis.

168

### 169 ***Detection of kdr-East and kdr-West alleles***

170 RT-PCR was used to detect the presence of both *kdr*-East and *kdr* -West alleles using DNA from  
171 F<sub>1</sub> mosquitoes. Following the protocol by Bass, *et al.* [25], samples were processed using the  
172 MxPro-Mx3005P software 'Allele Discrimination-SNP's' program with 1.5 µl of DNA as  
173 template. PCR was carried out under the following cycling conditions for *kdr*-East: 95°C for 10  
174 min then 40 cycles of 95°C for 10secs and 60°C for 45 sec. For *kdr*- West, the cycling conditions  
175 were 95°C for 10 min followed by 40 cycles of 92°C for 15 sec and 60°C for 60 sec.

176

### 177 ***Library preparation and 16S rRNA gene amplicon sequencing***

178 Using the 341f

179 **(TCGTCGGCAGCGTCAGATGTGTATAAGAGACAGCCTACGGGNGGCWGCAG)**

180 and 805r

181 **(GTCTCGTGGGCTCGGAGATGTGTATAAGAGACAGGACTACHVGGGTATCTAATC**

182 C) primers [26] with Illumina ® (San Diego, CA USA) overhang (bold typeface), the V3- V4

183 region of the universal bacterial and archaeal 16S rRNA gene was amplified using genomic

184 DNA from F<sub>1</sub> mosquitoes. Four no-template controls (PCR grade water), along with the six  
185 controls from the DNA extraction step—two cross-contamination controls (soil samples), and  
186 four blanks—were also processed. The PCR reaction mixture (25 µl total volume) comprised of  
187 10 µl of 2X KAPAHiFi HotStart Mix (Roche, Switzerland), 5 µM each of 341f and 805r primers  
188 and 5 µl of DNA template which was  $\geq 20$  ng/µl. Reactions were conducted using the BIO-RAD  
189 T100 thermal cycler with the following cycling conditions: 95°C for 3 min for initial  
190 denaturation, followed by 25 cycles of 95 °C for 30 sec, 55 °C for 30 sec, 72 °C for 30 sec and  
191 extension at 72 °C for 5 min. The resulting amplicons of ~ 460 bps were purified using  
192 Agencourt AMPure XP beads (Beckman Coulter Inc., Indianapolis, IN, USA) at 0.87 x sample  
193 volume and eluted in 45 µL TE buffer. The purified amplicons including those from blank and  
194 cross contamination controls were submitted to the Biotechnology Core Facility at the US  
195 Centers for Disease Control and Prevention, Atlanta for library preparation and sequencing.

196 Sequencing libraries were obtained using index PCR. This comprised NEBNext Hig-Fidelity 2X  
197 PCR master mix New England Biolabs Inc., Ipswich, MA), index primers from Nextera XT  
198 Index kit v2 set A, B and D; (Illumina, San Diego, CA), and 10-300 ng of each 16S rRNA gene  
199 amplicon, along with all controls, as template. PCR thermal cycler conditions were set to: 98 °C  
200 for 30 sec, followed by 8 cycles of 98 °C for 10 sec, 55 °C and 65 °C for 30 sec each, followed by  
201 a final extension at 65 °C for 5 min. The resulting products were cleaned using Agencourt  
202 AMPure XP beads at 1.2 x volume of each library. These were subsequently analyzed for size  
203 and concentration, normalized and pooled at a final concentration of 2 nM. The pool was  
204 denatured using Illumina guidelines for loading onto flowcell for cluster generation, and  
205 sequencing was performed on an Illumina Miseq using Miseq 2x250 cycle paired-end

206 sequencing kits. The resulting sequence reads were filtered for read quality, basecalled and  
207 demultiplexed using bcl2fastq (v2.19.1).

208

### 209 **Sequencing data quality control and generation of amplicon sequence variants (ASV) table**

210 Resulting raw paired-end sequencing reads were demultiplexed and imported into the  
211 Quantitative Insights Into Microbial Ecology (QIIME) 2 pipeline v.2018.11 [27] for analysis.  
212 Primers and adapter sequences were removed using the QIIME2 cutadapt plugin v.2018.11.0  
213 [28]. This was followed by quality filtering using the QIIME2 DADA2 plugin v.2018.11.0 to  
214 remove any sequencing errors, denoise and dereplicate paired-end sequences, filter out chimeras,  
215 and finally generate a frequency table of Amplicon Sequence Variants (ASVs, also referred  
216 hereafter as features) [29]. The quality filtering step was achieved using the `denoise-paired`  
217 command with the following parameters; `max_ee: 2, trunc_q: 2, trim_left_f:`  
218 `10, trim_left_r: 10, n_reads_learn: 1000000` and all other parameters left as  
219 default. The resulting frequency table was subsequently filtered to remove features associated  
220 with the controls, and those with frequency <100 prior to downstream analysis. Following these  
221 steps, 36 susceptible and 39 resistant mosquitoes remained, and were used for downstream  
222 analysis. The raw sample sequencing reads generated from this project, including those from  
223 negative (blank) and cross contamination (soil samples) controls, along with sample metadata,  
224 have been deposited in the National Center for Biotechnology Information (NCBI), Sequence  
225 Read Archive under the BioProject PRJNA672031

226

## 227 **Microbial community diversity analysis**

228 Alpha and beta diversity indices [30] were computed and compared between samples with  
229 differing resistance phenotypes. Shannon alpha diversity index, a quantitative measure of  
230 community richness and evenness, was computed using the `q2-diversity` plugin. To avoid  
231 introducing bias due to unequal sampling depth, prior to alpha diversity analysis, all samples  
232 were rarefied to a depth of 100 ASVs per sample (Suppl. 2), which was sufficient to capture the  
233 typical low microbiota diversity in individual mosquitoes. The Kruskal-Wallis test was used to  
234 compare Shannon diversity indices between insecticide resistant and susceptible samples with  
235 Benjamini-Hochberg false discovery rate (FDR) corrections.

236 Bray-Curtis dissimilarity beta diversity index, a quantitative measure used to determine  
237 compositional dissimilarity of features between samples, was also computed using the `q2-`  
238 `diversity` plugin. The Bray-Curtis dissimilarity matrices were computed using both rarefied  
239 (to a sampling depth of 100 ASVs per sample as described above) and unrarefied ASVs. Both  
240 resulted in significant differences between the microbiota of resistant and susceptible mosquitoes  
241 (Suppl. 3), thus, ordination outputs of only the latter are presented. Comparisons of the resulting  
242 distance matrices between resistant and susceptible samples were performed using permutational  
243 multivariate analysis of variance (PERMANOVA) at 999 permutations with Benjamini-  
244 Hochberg FDR corrections. Outputs were visualized using `phyloseq` package [31] in R [32]

245

## 246 **Taxonomic annotation of microbial features**

247 QIIME2 v 2018.11 `q2-feature-classifier` plugin [33] was used for taxonomic  
248 annotation. The Naïve Bayes classifier [34] was pre-trained on 16S SILVA reference (99%

249 identity) database v.128 [35]. Using the `qiime feature-classifier extract-reads`  
250 command, trimming was done to only target the V3-V4 region of the 16S rRNA gene (~ 425 bps  
251 length). The `qiime feature-table heatmap` plugin was subsequently used to visualize  
252 the resulting relative abundance of annotated ASVs across samples. The plugin's metrics and  
253 clustering methods were set to `braycurtis` and `features` respectively.

254 **Testing for differentially abundant microbial features between permethrin resistant and**  
255 **susceptible mosquitoes.**

256 The linear discriminant analysis (LDA) effect size method (LEfSe) [36] was used to identify  
257 ASVs that were differentially abundant between resistant and susceptible mosquitoes. Annotated  
258 ASVs were converted into abundance tables and uploaded to LEfSe Galaxy v.1.0  
259 (<http://huttenhower.sph.harvard.edu/lefse/>). With default parameters, an alpha value of 0.05 was  
260 used for both the factorial Kruskal-Wallis and pairwise Wilcoxon tests within LEfSe, and a  
261 threshold value of >2 was used on the resulting logarithmic LDA score to identify differentially  
262 abundant ASVs. The effect sizes of differentially abundant ASVs were visualized as bar plots.

263 The analysis of composition of microbiome method, ANCOM [37] , was used to verify the  
264 results obtained from LEfSe. The ANCOM analysis was called using the `q-2 composition`  
265 plugin, with the transform and difference functions set to `log_transform` and  
266 `mean_difference`, respectively. All other parameters were set to default. The resulting  
267 statistic, W, and its default cut off was used to identify differentially abundant features between  
268 resistant and susceptible mosquitoes.

269

270

271 **Results**

272 **Summary statistics of permethrin resistance phenotypes, *kdr* mutations and sequencing**  
273 **data**

274 A total of 133 adult F<sub>1</sub> female *An. gambiae s.s.* were tested for resistance to permethrin using 5X  
275 (107.5 µg/ml) the discriminating dose (21.5 µg/ml) of the insecticide, and 52.6% of the samples  
276 tested were found to be susceptible. One hundred of the screened samples (50 resistant and 50  
277 susceptible) were subsequently processed for characterizing the microbiota and *kdr* allele  
278 frequencies. Of all 100 samples, 99% had the *kdr* east (*Vgsc\_1014S*) mutation and the remaining  
279 one had the *kdr* west (*Vgsc\_1014F*) gene mutation. This high frequency of *kdr* east mutation  
280 indicated fixation in the mosquito population and thus precluded further correlation analysis  
281 between microbial composition and *kdr* allele frequencies. Microbial community  
282 characterization of all 100 samples yielded 4,319,065 raw sequencing reads, in addition to 5,226  
283 raw reads from blank and cross-contamination controls (Suppl. 1). Following sequencing data  
284 quality control and subsequent removal of features associated with controls and those with  
285 frequency < 100, 36 susceptible and 39 resistant samples remained and were used for  
286 downstream analysis

287

288 **Microbiota composition differed between permethrin resistant and susceptible *An. gambiae***  
289 ***s.s.***

290 Comparison of Bray-Curtis dissimilarity indices using PERMANOVA, showed significant  
291 differences in bacterial composition between permethrin resistant and susceptible mosquitoes  
292 (pseudo-F=2.33,  $p=0.001$ ). This heterogeneity in microbial community structure associated with  
293 insecticide resistance status was further illustrated by principal coordinates analysis (PCoA), in  
294 which the microbiota of susceptible samples clustered closely together and away from those of  
295 primarily dispersed resistant samples (Figure 2).

296 Considering microbial diversity within each group, Kruskal-Wallis comparison showed no  
297 difference in Shannon diversity between the microbiota of permethrin resistant and susceptible  
298 mosquitoes ( $H = 0.45$ ,  $p = 0.50$ ) (Suppl. 4)

299

300

301 **Figure 2: A Principal Coordinate analysis (PCoA) plot of Bray-Curtis distances between**  
302 **the microbiota of permethrin resistant and susceptible *An. gambiae s.s.*** Each point on the  
303 plot represents the microbial composition of a single mosquito. The susceptible samples  
304 clustered closely together and away from the primarily dispersed resistant samples. The Bray-  
305 Curtis comparison using permutational multivariate analysis of variance (999 permutations)  
306 showed a significant difference in microbial composition between resistant and susceptible  
307 samples (pseudo-F=2.33,  $p=0.001$ ).

308

309 ***Anopheles gambiae* s.s. from Tulukuyi comprised sparse but diverse microbial taxa that**  
310 **differed by permethrin susceptibility status**

311 Taxonomic annotation was performed to the genus level or to the lowest possible taxonomic  
312 rank. The relative frequencies of annotated bacterial taxa for each sample are presented in Figure  
313 3. Overall, ASVs from *An. gambiae* s.s. microbiota were assigned to 84 bacterial taxa (Suppl. 5),  
314 and out of these, less than half (36 taxa) were shared between permethrin resistant and  
315 susceptible *An. gambiae* s.s.. There were 28 and 20 unique bacterial taxa in permethrin  
316 susceptible and resistant samples, respectively (Figure 3a, Suppl 4). At the genus level, a total of  
317 66 bacterial genera were identified, 29 of which were shared between resistant and susceptible  
318 mosquitoes, while 21 and 16 were unique to permethrin susceptible and resistant mosquitoes  
319 respectively (Figure 3b, Suppl. 5).

320

**Figure 3: Venn diagrams showing number of bacterial taxa unique to or shared between 39 permethrin resistant and 36 susceptible mosquitoes. Panel A. shows number of bacterial taxa annotated to the genus or lowest possible taxonomic rank, and B. shows number at the genus level.**

321

322

323 The most abundant bacterial taxa across all samples were those assigned to *Asaia* (38.33%),  
324 *Enterobacter* (7.25%), *Acinetobacter* (3.88%), *Klebsiella* (3.84%), an uncharacterized  
325 *Enterobacteriaceae* (3.30%), and *Lysinibacillus* (3.27%), together accounting for more than 55%  
326 of ASVs (Suppl. 5). A total of 16 genera were unique to resistant mosquito samples including  
327 *Lysinibacillus*, *Thorsellia*, *Streptococcus* and *Altererythrobacter*, among others (Suppl 4). The



328 six most dominant genera among resistant mosquitoes were *Lysinibacillus* (13.97%),  
329 *Pseudomonas* (11.95%), *Acinetobacter* (8.54%), *Thorsellia* (6.49%), *Asaia* (4.23%) and *Bacillus*  
330 (4.08%). On the other hand, 21 genera were only found in the susceptible mosquito samples  
331 including *Marmoricola*, *Roseomonas*, *Dyadobacter*, *Lactococcus*, and *Myxococcus*, among  
332 others. Among susceptible mosquitoes, *Asaia* was the most dominant, with a relative abundance  
333 of 48.76% followed by *Enterobacter* (9.23%), *Klebsiella* (4.41%), *Enterococcus* (3.63%) and  
334 *Acinetobacter* (2.45%).

335 A few resistant and susceptible individuals had highly diverse microbiota, with ASVs assigned to  
336 between 14 and 37 bacterial taxa (Figure 4 and Suppl.4). The sample with the highest bacterial  
337 diversity was a permethrin susceptible mosquito. Notably, some bacterial taxa were detected  
338 more frequently in resistant compared to susceptible mosquitoes. These included the genus  
339 *Rubrobacter* which was detected at low abundance in 20 of the 39 permethrin resistant samples  
340 and only in two susceptible mosquito samples, also at low levels of abundance. Similarly, ASVs  
341 assigned to unclassified *Rhodospirillales* (JG37-AG-20) and unclassified *Obscuribacteriales*  
342 were detected in 18 and 9 resistant mosquitoes, respectively, but only in 1 and 4 susceptible  
343 mosquitoes, respectively. ASVs assigned to the genera *Streptococcus*, *Thermomonas*,  
344 *Sphingobacterium*, *Ornithinimicrobium* and *Lysinibacillus* were detected in more permethrin  
345 resistant samples compared to the susceptible samples (Figure 4 and Suppl.4). On the other hand,  
346 ASVs annotated as unclassified *Enterobacteriaceae* were predominant in the susceptible  
347 mosquitoes and were detected in 10 of these samples in contrast to only 4 resistant samples.

**Figure 4. Heatmap showing frequency of annotated ASVs.** Frequency of ASVs from the microbiota of individual permethrin resistant (n = 39) and susceptible (n = 36) *An. gambiae s. s.* from Tulukuyi. The annotation of ASVs was done to the genus level or lowest possible taxonomic level.

348

349

350 **Differentially abundant bacterial taxa between insecticide resistant and susceptible**

351 **mosquitoes**

352 Linear discriminant analysis (LEfSe) also revealed significant differences in microbiota

353 composition between susceptible and resistant mosquitoes. Focusing on the genus level, four

354 bacterial genera, *Spingobacterium*, *Streptococcus*, *Lysinibacillus*, and *Rubroacter*, and an

355 uncultured bacterium were highlighted by LEfSe as more abundant in resistant mosquitoes

356 (Figure 5). The first three genera were only detected in resistant mosquitoes, while *Rubroacter*

357 and the uncultured bacterium were at least three-fold more abundant in resistant compared to

358 susceptible mosquitoes (Figure 5 and Suppl. 5). On the other hand, LEfSe identified only one

359 bacterial genus, *Myxococcus*, as more abundant in the susceptible samples (Figure 5); this genus

360 was not detected at all in the resistant samples (Suppl. 5). Although more bacterial genera were

361 unique to either resistant or susceptible mosquitoes (Figure 3b and Suppl. 5), LEfSe highlighted

362 those that were present in at least four individuals.

363 The ANCOM method further corroborated these results. Being more stringent, and not

364 considering features that were unique to either sample category, it identified features assigned to

365 the genus *Rubroacter* (W= 51) and unclassified *Rhodospirillales* (JG37-AG-20) (W = 63) as

366 significantly more abundant in resistant compared to susceptible samples (Suppl. 6).

**Figure 5: Differentially abundant bacterial genera between permethrin resistant and susceptible mosquitoes.** The green and the red bars represent taxa which were significantly more abundant in the susceptible and resistant samples, respectively, at log 10 transformation. Taxonomic levels are designated as D\_1\_phylum, D\_2\_class, D\_3\_order, D\_4\_family, D\_5\_genus.

367

368

369

## 370 **Discussion**

371 Recently, studies of *An. stephensi*, *An. arabiensis* and *An. albimanus* have shown links between  
372 mosquito-associated microbiota and resistance to pyrethroids and organophosphates [9, 10, 18,  
373 19]. In this study we comparatively characterized the microbiota between pyrethroid resistant  
374 and susceptible F<sub>1</sub> progeny of field-derived *An. gambiae s.s.* Our results showed significant  
375 differences in microbiota composition between resistant and susceptible mosquitoes with  
376 enrichment of different bacterial taxa between resistant and susceptible mosquitoes.

377 We detected intense resistance (at 5X the diagnostic dose) to permethrin, along with high  
378 frequency (99.14%) of the *kdr* east allele in the F<sub>1</sub> progeny originating from Tulukuyi, Western  
379 Kenya. These findings corroborate earlier reports of high pyrethroid resistance in the same area  
380 [6, 20]. Multiple studies from western Kenya have indicated that the high intensity of insecticide  
381 resistance may be contributing to mosquito control failure [20, 21]. The high frequency of the  
382 *kdr* east allele suggests that the mutation is fixed in this mosquito population. Other studies  
383 conducted in western Kenya have also reported the presence of high *kdr east* allele frequencies  
384 which is attributed to the continued use of insecticide-based vector control methods [20, 38-40].  
385 However, our results showed that the allele was fixed regardless of resistance phenotype,  
386 suggesting that additional mechanisms, such as the overexpression of detoxification enzymes  
387 (e.g. cytochrome P450s [41]), are more important than *kdr* in conferring the intense permethrin  
388 resistance detected in the population. The fixation of the *kdr* east mutation in the population also  
389 precluded further analysis of any associations between *kdr* alleles and the mosquito microbiota.  
390 Indeed, a recent study identified no links between the two [42]. We thus hypothesize that any  
391 microbe-mediated mechanism of insecticide resistance would be largely distinct from the  
392 mosquito host's genetics, and likely of a metabolic nature.

393 Our results showed diverse bacterial taxa from individual *An. gambiae s.s.* samples, a majority of  
394 which have previously been identified in *Anopheles* and other mosquito genera including *Aedes*  
395 *aegypti* [43-46]. However, less than half of the detected microbial taxa were shared between  
396 permethrin resistant and susceptible mosquitoes, suggesting insecticide resistance-related  
397 physiological differences that favored different bacterial taxa.

398 Our results also showed significant differences in microbiota composition and structure between  
399 permethrin resistant and susceptible *An. gambiae s.s.* There is evidence that insecticide  
400 detoxifying microbes in agricultural insect pests contribute to insecticide resistance in their hosts  
401 [47, 48]. Recent studies on mosquitoes have also identified insecticide resistance- and/or  
402 exposure-driven alterations of the host microbiota. In particular, *Anopheles albimanus*  
403 microbiota differed by resistance to fenitrothion and was altered by exposure to different  
404 pyrethroids, and *Aedes aegypti* microbiota differed by resistance to lambda-cyhalothrin [9, 10,  
405 49]. These findings suggest that insecticide resistance in mosquitoes favor the proliferation of  
406 certain bacterial taxa, possibly those that can degrade and metabolize insecticides. Recent studies  
407 [9, 10] identified known insecticide-metabolizing bacterial taxa in *Anopheles albimanus* that  
408 were exposed or resistant to insecticides. Huang, *et al.* [50] and Tang, *et al.* [51] documented  
409 that certain microorganisms (considered as potential candidates for bioremediation), including  
410 bacteria, degrade pesticides in the soil by breaking them down into smaller compounds, utilizing  
411 them as their source of nutrients and making them less toxic to the environment. Some of these  
412 microorganisms degrade pesticides to create conducive environments for their survival and not  
413 for nutritional requirements [51]. The different taxa present in the resistant vs susceptible  
414 mosquitoes, particularly those of resistant mosquitoes, is suggestive of this type of adaptation.

415 Despite significant differences in microbiota composition and structure (beta diversity), there  
416 was no significant difference in alpha (Shannon) diversity between the microbiota of resistant  
417 and susceptible mosquitoes. This is suggestive of a homeostatic-controlled number of microbial  
418 taxa across individual mosquitoes, with an insecticide resistance-associated perturbation of the  
419 type and relative abundance of specific microbial taxa. Mosquitoes used in this study were F<sub>1</sub>  
420 progeny of wild adult females collected from the same location and reared under identical  
421 conditions. Except for their permethrin resistance status, which was determined at 2-3 days post  
422 adult eclosion, the mosquitoes had identical physiological characteristics. These identical rearing  
423 conditions and subsequent uniform physiological characteristics may explain the homogeneity in  
424 alpha diversity across samples. On the other hand, the differences in microbial composition  
425 associated with their permethrin resistance status provide further evidence of insecticide  
426 selection pressure on the mosquito microbiota. It is well known that a majority of the mosquito  
427 microbiota is obtained from mosquito aquatic habitats at the larval stage, and also from food  
428 sources as adults [13]. Newly emerged adults can also imbibe bacteria along with water from  
429 their larval habitats during eclosion or through transstadial transmission [52]. However, other  
430 factors such as mosquito physiological status [11, 52, 53] affect what microbes persist and  
431 colonize the mosquitoes following acquisition, and this could explain the insecticide resistance-  
432 associated differences in composition despite similar alpha diversity across all individual  
433 samples.

434 Differential abundance testing identified *Sphingobacterium*, *Lysinibacillus*, *Streptococcus* and  
435 *Rubrobacter* as significantly more abundant in resistant mosquitoes and *Myxococcus* as  
436 significantly more abundant in susceptible mosquitoes. The first three genera were only detected  
437 in resistant mosquitoes, while *Rubrobacter* was at least three-fold more abundant in resistant

438 compared to susceptible mosquitoes. In a study conducted by Hu, *et al.* [54], *Lysinibacillus*  
439 *sphaericus* was identified as a microbe with the ability to degrade up to 83% of cyfluthrin (a  
440 pyrethroid) after 5 days of incubation by utilizing the insecticide as its source of carbon or  
441 nitrogen. In the current study, *Lysinibacillus* was only detected in resistant mosquitoes, likely as  
442 a result of its ability to utilize pyrethroids. Lozano and Dussán [55] also described the potential  
443 of *Lysinibacillus sphaericus* to be used in bioremediation of heavy metals. *Sphingobacterium*  
444 and *Streptococcus*, also only detected in resistant mosquitoes in this study, are bacterial genera  
445 known to degrade pyrethroid insecticides such as cypermethrin [56-58]. Bacteria belonging to  
446 the genera *Streptococcus* and *Rubrobacter* have been categorized as core microbiota of the  
447 digestive system of *Anopheles culicifacies* [59]. Although not documented for pyrethroid  
448 degradation or metabolism, *Rubrobacter* are known to be thermophilic and extremely resistant to  
449 UV thermal and gamma radiations [60]. Some other bacterial genera belonging to  
450 *Actinobacteria*, the phylum to which *Rubrobacter* belongs, have been associated with  
451 degradation of insecticides including pyrethroids [61, 62], and the overabundance of  
452 *Rubrobacter* in insecticide resistant mosquitoes could suggest their contribution to resistance. On  
453 the other hand, the genus *Myxococcus* was only detected in susceptible mosquitoes. This  
454 bacterial genus is known to be predatory on other bacteria [63], chitinase-producing [64],  
455 capable of producing various bioactive antifungal agents [65], and inhibitors of cellular  
456 respiration [66]. However, their association with mosquito physiology or insecticide  
457 susceptibility has not yet been described. Given what is known about this bacterial genus, it is  
458 possible that they could also be toxic to mosquitoes by directly inhibiting host's cellular  
459 respiration and/or indirectly preying on other members of the mosquito microbiota that are  
460 necessary for host's survival and or insecticide metabolism. Further studies are necessary to

461 elucidate the role of *Myxococcus* and their secondary metabolites on mosquito physiology,  
462 including insecticide susceptibility.

463 In an aquatic microcosm, it has been demonstrated that insecticides, if used singly or in  
464 combination, can reduce microbial diversity and/or induce shifts in microbial community  
465 structure [67]. Recent studies have also demonstrated shifts in mosquito microbiota and larval  
466 water microbiota that were associated with insecticide exposure [10, 67]. This indicates that  
467 insecticide exposure shapes the microbial composition of mosquitoes and their habitats. This is  
468 likely due to the toxic effects of insecticides on some microbes, while at the same time favoring  
469 the proliferation of other tolerant microbes as described by Johnsen, *et al.* [68]. It is also possible  
470 that in addition to, or rather than selection pressure, the presence of specific insecticide-  
471 metabolizing microbes in mosquitoes induce resistance to insecticides and precludes colonization  
472 by other microbes. In *Aedes aegypti* it has been demonstrated that infections with certain  
473 microbes precludes colonization by others [69], and that microbial interactions within  
474 mosquitoes shape their microbial community [9, 70]. Further research on these microbial  
475 networks could shed more light on the role of the mosquito microbiota in insecticide resistance.  
476 [10, 67].

477

## 478 **Conclusion**

479 In this study, we detected intense permethrin resistance in F<sub>1</sub> progeny of field-collected *An.*  
480 *gambiae* s.s. from Tulukuyi, Bungoma, western Kenya. This was accompanied by a high  
481 frequency of (> 99%) of the *kdr* east allele, suggesting fixation in the population.



482 We also show, for the first time, significant differences in microbiota composition between  
483 permethrin resistant and susceptible *An. gambiae s.s.* These findings corroborate results of  
484 previous research on other *Anopheles* species from different geographic locations. The  
485 abundance of *Rubrobacter*, *Lysinibacillus*, *Sphingobacterium* and *Streptococcus* were associated  
486 with resistant mosquitoes, while the abundance of *Myxococcus* was associated with susceptible  
487 mosquitoes. The enrichment of these specific bacterial taxa highlights the potential for  
488 discovering novel microbial markers of insecticide resistance that could complement existing  
489 insecticide resistance surveillance tools. With this increasing evidence of associations between  
490 mosquito microbiota and insecticide resistance, future work will evaluate the underlying  
491 microbial mechanisms of insecticide resistance.

492 **List of abbreviations**

493 ASL: Above sea level

494 ASVs: Amplicon Sequence Variants

495 CDC: Centre for Disease Control

496 FDR: False discovery rate

497 IRS: Indoor residual spraying

498 Kdr: Knock Down Resistance gene

499 KEMRI-CGHR: Kenya Medical Research Institute-Center for Global Health Research

500 LDA: Linear Discriminant analysis

501 LEfSe: Linear discriminant analysis effect size

502 LLINs: Long Lasting Insecticidal Nets

503 PCoA: Principal Co-ordinates Analysis

504 PERMANOVA: Permutational multivariate analysis of variance

505 QIIME: Quantitative Insights Into Microbial Ecology

506 rRNA: Ribosomal Ribonucleic acid

507 **Declarations**

508 **Ethics approval and consent to participate**

509 This study was approved by the Kenya Medical Research Institute (KEMRI) Ethical Review

510 Board under the scientific steering committee (SSC 2776). Oral consent was obtained from each

511 household head prior to mosquito collections.

512 **Consent for publication**

513 Not applicable

514 **Availability of data and materials**

515 The raw sample sequencing reads generated from this project, including those from negative  
516 (blank) and cross contamination (soil samples) controls, along with sample metadata, have been  
517 deposited in the National Center for Biotechnology Information (NCBI), Sequence Read Archive  
518 under the BioProject PRJNA672031

519 **Competing interests**

520 All the authors declare that they have no competing interests

521 **Funding**

522 This study was supported by funds from Grand Challenges, an initiative of the Bill & Melinda  
523 Gates Foundation (OPP1210769) awarded to the Kenya Medical Research Institute (KEMRI),  
524 the US Centers for Disease Control and Prevention (CDC), and the American Society of Tropical  
525 Medicine and Hygiene (ASTMH) through the American Committee of Medical Entomology  
526 Future Leaders in International Entomology Fellowship awarded to ND. The findings and  
527 conclusions in this paper are those of the authors and do not necessarily represent the official  
528 position of KEMRI, CDC or ASTMH.

529 **Authors' contributions**

530 ND conceptualized and designed the study; EO facilitated and provided laboratory facilities for  
531 field work; ND, EO, MS & AL provided resources for molecular analysis; DO, MK, SO and EE  
532 performed mosquito collections, mass rearing and bioassays; DO and MS performed molecular  
533 analysis and sequencing; ND, EMN & EO supervised the work; DO and ND performed the data  
534 analysis and drafted the manuscript; all authors reviewed and approved the final version of the  
535 manuscript.

536 **Acknowledgements**

537 We acknowledge and thank the homeowners in Tulukuyi village for access to their homes during  
538 mosquito collections, without which this study would not have been possible; Evans Olang and  
539 Duncan Omondi from Kenya Medical Research Institute, for assistance during mosquito  
540 collections; Maurice Ombok from Kenya Medical Research Institute for the map of Tulukuyi,  
541 and the Biotechnology Core Facility at the US Centers for Disease Control and Prevention for  
542 sequencing our samples. We are grateful to the KEMRI Director General for the permission to  
543 publish this work.

544

545 **References**

- 546 1. WHO WHO: **World Malaria Report 2018**. Geneva2018.
- 547 2. MOH: **The Kenya Malaria Strategy 2009-2018 (Revised 2014)**. Nairobi, Kenya:  
548 Ministry of Public Health and Sanitation; 2014.
- 549 3. Bhatt S, Weiss D, Cameron E, Bisanzio D, Mappin B, Dalrymple U, Battle K, Moyes C,  
550 Henry A, Eckhoff P: **The effect of malaria control on Plasmodium falciparum in**  
551 **Africa between 2000 and 2015**. *Nature* 2015, **526**:207.
- 552 4. Ochomo E, Bayoh NM, Kamau L, Atieli F, Vulule J, Ouma C, Ombok M, Njagi K, Soti  
553 D, Mathenge E: **Pyrethroid susceptibility of malaria vectors in four Districts of**  
554 **western Kenya**. *Parasites & vectors* 2014, **7**:310.
- 555 5. WHO: **World Malaria report 2017**. Geneva: World Health Organization; 2017.
- 556 6. Wanjala CL, Mbugi JP, Ototo E, Gesuge M, Afrane YA, Atieli HE, Zhou G, Githeko  
557 AK, Yan G: **Pyrethroid and DDT resistance and organophosphate susceptibility**  
558 **among Anopheles spp. mosquitoes, western Kenya**. *Emerging infectious diseases*  
559 2015, **21**:2178.
- 560 7. Riveron JM, Tchouakui M, Mugenzi L, Menze BD, Chiang M-C, Wondji CS:  
561 **Insecticide resistance in malaria vectors: an update at a global scale**. In *Towards*  
562 *malaria elimination-a leap forward*. IntechOpen; 2018

- 563 8. Corbel V, N'Guessan R: **Distribution, mechanisms, impact and management of**  
564 **insecticide resistance in malaria vectors: a pragmatic review.** In *Anopheles*  
565 *mosquitoes-New insights into malaria vectors*. IntechOpen; 2013
- 566 9. Dada N, Sheth M, Liebman K, Pinto J, Lenhart A: **Whole metagenome sequencing**  
567 **reveals links between mosquito microbiota and insecticide resistance in malaria**  
568 **vectors.** *Scientific reports* 2018, **8**:1-13.
- 569 10. Dada N, Lol JC, Benedict AC, López F, Sheth M, Dzuris N, Padilla N, Lenhart A:  
570 **Pyrethroid exposure alters internal and cuticle surface bacterial communities in**  
571 **Anopheles albimanus.** *The ISME journal* 2019, **13**:2447-2464.
- 572 11. Minard G, Mavingui P, Moro CV: **Diversity and function of bacterial microbiota in**  
573 **the mosquito holobiont.** *Parasites & vectors* 2013, **6**:146.
- 574 12. Douglas AE: **Multiorganismal insects: diversity and function of resident**  
575 **microorganisms.** *Annual review of entomology* 2015, **60**:17-34.
- 576 13. Guégan M, Zouache K, Démichel C, Minard G, Potier P, Mavingui P, Moro CV: **The**  
577 **mosquito holobiont: fresh insight into mosquito-microbiota interactions.** *Microbiome*  
578 2018, **6**:49.
- 579 14. Gonzalez-Ceron L, Santillan F, Rodriguez MH, Mendez D, Hernandez-Avila JE:  
580 **Bacteria in midguts of field-collected Anopheles albimanus block Plasmodium vivax**  
581 **sporogonic development.** *Journal of medical entomology* 2003, **40**:371-374.

- 582 15. Azambuja P, Garcia ES, Ratcliffe NA: **Gut microbiota and parasite transmission by**  
583 **insect vectors.** *Trends in parasitology* 2005, **21**:568-572.
- 584 16. Boissière A, Tchioffo MT, Bachar D, Abate L, Marie A, Nsango SE, Shahbazkia HR,  
585 Awono-Ambene PH, Levashina EA, Christen R: **Midgut microbiota of the malaria**  
586 **mosquito vector *Anopheles gambiae* and interactions with *Plasmodium falciparum***  
587 **infection.** *PLoS pathogens* 2012, **8**:e1002742.
- 588 17. Wang S, Dos-Santos AL, Huang W, Liu KC, Oshaghi MA, Wei G, Agre P, Jacobs-  
589 Lorena M: **Driving mosquito refractoriness to *Plasmodium falciparum* with**  
590 **engineered symbiotic bacteria.** *Science* 2017, **357**:1399-1402.
- 591 18. Barnard K, Jeanrenaud AC, Brooke BD, Oliver SV: **The contribution of gut bacteria to**  
592 **insecticide resistance and the life histories of the major malaria vector *Anopheles***  
593 ***arabiensis* (Diptera: Culicidae).** *Scientific reports* 2019, **9**:1-11.
- 594 19. Soltani A, Vatandoost H, Oshaghi MA, Enayati AA, Chavshin AR: **The role of midgut**  
595 **symbiotic bacteria in resistance of *Anopheles stephensi* (Diptera: Culicidae) to**  
596 **organophosphate insecticides.** *Pathogens and global health* 2017, **111**:289-296.
- 597 20. Ochomo E, Bayoh M, Brogdon W, Gimnig J, Ouma C, Vulule J, Walker E: **Pyrethroid**  
598 **resistance in *Anopheles gambiae* ss and *Anopheles arabiensis* in western Kenya:**  
599 **phenotypic, metabolic and target site characterizations of three populations.** *Medical*  
600 *and veterinary entomology* 2013, **27**:156-164.

- 601 21. Omondi S, Mukabana WR, Ochomo E, Muchoki M, Kemei B, Mbogo C, Bayoh N:  
602 **Quantifying the intensity of permethrin insecticide resistance in Anopheles**  
603 **mosquitoes in western Kenya.** *Parasites & Vectors* 2017, **10**:548.
- 604 22. Collins FH, Mendez MA, Rasmussen MO, Mehaffey PC, Besansky NJ, Finnerty V: **A**  
605 **ribosomal RNA gene probe differentiates member species of the Anopheles gambiae**  
606 **complex.** *The American journal of tropical medicine and hygiene* 1987, **37**:37-41.
- 607 23. Scott JA, Brogdon WG, Collins FH: **Identification of single specimens of the**  
608 **Anopheles gambiae complex by the polymerase chain reaction.** *The American journal*  
609 *of tropical medicine and hygiene* 1993, **49**:520-529.
- 610 24. Centers for Disease Control and Prevention (CDC): *Guideline for evaluating insecticide*  
611 *resistance in vectors using the CDC bottle bioassay.* Atlanta: The Centers: CDC; 2010.
- 612 25. Bass C, Nikou D, Donnelly MJ, Williamson MS, Ranson H, Ball A, Vontas J, Field LM:  
613 **Detection of knockdown resistance (kdr) mutations in Anopheles gambiae: a**  
614 **comparison of two new high-throughput assays with existing methods.** *Malaria*  
615 *Journal* 2007, **6**:111.
- 616 26. Hugerth LW, Wefer HA, Lundin S, Jakobsson HE, Lindberg M, Rodin S, Engstrand L,  
617 Andersson AF: **DegePrime, a program for degenerate primer design for broad-**  
618 **taxonomic-range PCR in microbial ecology studies.** *Appl Environ Microbiol* 2014,  
619 **80**:5116-5123.
- 620 27. Bolyen E, Rideout JR, Dillon MR, Bokulich NA, Abnet CC, Al-Ghalith GA, Alexander  
621 H, Alm EJ, Arumugam M, Asnicar F: **Reproducible, interactive, scalable and**



- 622           **extensible microbiome data science using QIIME 2.** *Nature biotechnology* 2019,  
623           **37:852-857.**
- 624   28.   Martin M: **Cutadapt removes adapter sequences from high-throughput sequencing**  
625           **reads.** *EMBnet journal* 2011, **17:10-12.**
- 626   29.   Callahan BJ, McMurdie PJ, Rosen MJ, Han AW, Johnson AJA, Holmes SP: **DADA2:**  
627           **high-resolution sample inference from Illumina amplicon data.** *Nature methods* 2016,  
628           **13:581.**
- 629   30.   **Alpha and Beta Diversity Explanations and Commands**  
630           [<https://forum.qiime2.org/t/alpha-and-beta-diversity-explanations-and-commands/2282>]
- 631   31.   McMurdie PJ, Holmes S: **phyloseq: an R package for reproducible interactive**  
632           **analysis and graphics of microbiome census data.** *PloS one* 2013, **8:e61217.**
- 633   32.   Crawley MJ: **The R Book. Hoboken. NJ: John Wiley & Sons doi** 2007,  
634           **10:9780470515075.**
- 635   33.   Bokulich NA, Kaehler BD, Rideout JR, Dillon M, Bolyen E, Knight R, Huttley GA,  
636           Caporaso JG: **Optimizing taxonomic classification of marker-gene amplicon**  
637           **sequences with QIIME 2's q2-feature-classifier plugin.** *Microbiome* 2018, **6:90.**
- 638   34.   Zhang H: **The Optimality of Naive Bayes, 2004.** *American Association for Artificial*  
639           **Intelligence (www aaai org) 2004.**

- 640 35. Quast C, Pruesse E, Yilmaz P, Gerken J, Schweer T, Yarza P, Peplies J, Glöckner FO:  
641 **The SILVA ribosomal RNA gene database project: improved data processing and**  
642 **web-based tools.** *Nucleic acids research* 2012, **41**:D590-D596.
- 643 36. Segata N, Izard J, Waldron L, Gevers D, Miropolsky L, Garrett WS, Huttenhower C:  
644 **Metagenomic biomarker discovery and explanation.** *Genome biology* 2011, **12**:R60.
- 645 37. Mandal S, Van Treuren W, White RA, Eggesbø M, Knight R, Peddada SD: **Analysis of**  
646 **composition of microbiomes: a novel method for studying microbial composition.**  
647 *Microbial ecology in health and disease* 2015, **26**:27663.
- 648 38. Mathias DK, Ochomo E, Atieli F, Ombok M, Bayoh MN, Olang G, Muhia D, Kamau L,  
649 Vulule JM, Hamel MJ: **Spatial and temporal variation in the kdr allele L1014S in**  
650 **Anopheles gambiae ss and phenotypic variability in susceptibility to insecticides in**  
651 **Western Kenya.** *Malaria journal* 2011, **10**:10.
- 652 39. Wanjala CL, Kweka EJ: **Malaria vectors insecticides resistance in different**  
653 **agroecosystems in Western Kenya.** *Frontiers in public health* 2018, **6**:55.
- 654 40. Ochomo E, Subramaniam K, Kemei B, Rippon E, Bayoh NM, Kamau L, Atieli F, Vulule  
655 JM, Ouma C, Gimnig J: **Presence of the knockdown resistance mutation, Vgsc-1014F**  
656 **in Anopheles gambiae and An. arabiensis in western Kenya.** *Parasites & vectors*  
657 2015, **8**:616.
- 658 41. David J-P, Ismail HM, Chandor-Proust A, Paine MJI: **Role of cytochrome P450s in**  
659 **insecticide resistance: impact on the control of mosquito-borne diseases and use of**

- 660            **insecticides on Earth.** *Philosophical Transactions of the Royal Society B: Biological*  
661            *Sciences* 2013, **368**:20120429.
- 662    42.    Bogale HN, Cannon MV, Keita K, Camara D, Barry Y, Keita M, Coulibaly D, Kone AK,  
663            Doumbo OK, Thera MA: **Relative Contributions of Genetic and Non-Genetic Factors**  
664            **on Mosquito Microbiota.** 2020.
- 665    43.    Muturi EJ, Dunlap C, Ramirez JL, Rooney AP, Kim C-H: **Host blood-meal source has a**  
666            **strong impact on gut microbiota of *Aedes aegypti*.** *FEMS microbiology ecology* 2019,  
667            **95**:fiy213.
- 668    44.    Wang Y, Gilbreath III TM, Kukutla P, Yan G, Xu J: **Dynamic gut microbiome across**  
669            **life history of the malaria mosquito *Anopheles gambiae* in Kenya.** *PloS one* 2011,  
670            **6**:e24767.
- 671    45.    Rani A, Sharma A, Rajagopal R, Adak T, Bhatnagar RK: **Bacterial diversity analysis of**  
672            **larvae and adult midgut microflora using culture-dependent and culture-**  
673            **independent methods in lab-reared and field-collected *Anopheles stephensi*-an**  
674            **Asian malarial vector.** *BMC microbiology* 2009, **9**:96.
- 675    46.    Villegas LM, Pimenta PFP: **Metagenomics, paratransgenesis and the *Anopheles***  
676            **microbiome: a portrait of the geographical distribution of the anopheline**  
677            **microbiota based on a meta-analysis of reported taxa.** *Memórias do Instituto Oswaldo*  
678            *Cruz* 2014, **109**:672-684.
- 679    47.    Xia X, Zheng D, Zhong H, Qin B, Gurr GM, Vasseur L, Lin H, Bai J, He W, You M:  
680            **DNA sequencing reveals the midgut microbiota of diamondback moth, *Plutella***

- 681 **xylostella (L.) and a possible relationship with insecticide resistance. *PLoS One* 2013,**  
682 **8:e68852.**
- 683 48. van den Bosch TJ, Welte CU: **Detoxifying symbionts in agriculturally important pest**  
684 **insects. *Microbial biotechnology* 2017, 10:531-540.**
- 685 49. Arévalo-Cortés A, Mejia-Jaramillo AM, Granada Y, Coatsworth H, Lowenberger C,  
686 Triana-Chavez O: **The Midgut Microbiota of Colombian *Aedes aegypti* Populations**  
687 **with Different Levels of Resistance to the Insecticide Lambda-cyhalothrin. *Insects***  
688 **2020, 11:584.**
- 689 50. Huang Y, Xiao L, Li F, Xiao M, Lin D, Long X, Wu Z: **Microbial degradation of**  
690 **pesticide residues and an emphasis on the degradation of cypermethrin and 3-**  
691 **phenoxy benzoic acid: a review. *Molecules* 2018, 23:2313.**
- 692 51. Tang W, Ji H, Hou X: **Research Progress of Microbial Degradation of**  
693 **Organophosphorus Pesticides. *Prog. Appl Microbiol* 2018, 1:29-35.**
- 694 52. Coon KL, Vogel KJ, Brown MR, Strand MR: **Mosquitoes rely on their gut microbiota**  
695 **for development. *Molecular ecology* 2014, 23:2727-2739.**
- 696 53. Muturi EJ, Kim C-H, Bara J, Bach EM, Siddappaji MH: ***Culex pipiens* and *Culex***  
697 **restuans mosquitoes harbor distinct microbiota dominated by few bacterial taxa.**  
698 ***Parasites & vectors* 2016, 9:18.**

- 699 54. Hu GP, Zhao Y, Song FQ, Liu B, Vasseur L, Douglas C, You MS: **Isolation,**  
700 **identification and cyfluthrin-degrading potential of a novel *Lysinibacillus***  
701 **sphaericus strain, FLQ-11-1.** *Research in microbiology* 2014, **165**:110-118.
- 702 55. Lozano LC, Dussán J: **Metal tolerance and larvicidal activity of *Lysinibacillus***  
703 **sphaericus.** *World Journal of Microbiology and Biotechnology* 2013, **29**:1383-1389.
- 704 56. Zhang J, Zheng J-W, Cho BC, Hwang CY, Fang C, He J, Li S-P: **Sphingobacterium**  
705 **wenxiniae sp. nov., a cypermethrin-degrading species from activated sludge.**  
706 *International journal of systematic and evolutionary microbiology* 2012, **62**:683-687.
- 707 57. Dubey KK, Fulekar M: **Investigation of potential rhizospheric isolate for**  
708 **cypermethrin degradation.** *3 Biotech* 2013, **3**:33-43.
- 709 58. Shamsuddeen U, Inuwa A: **Utilization of cypermethrin by bacteria isolated from**  
710 **irrigated soils.** *Bayero Journal of Pure and Applied Sciences* 2013, **6**:19–22-19–22.
- 711 59. Sharma P, Sharma S, Maurya RK, De TD, Thomas T, Lata S, Singh N, Pandey KC,  
712 Valecha N, Dixit R: **Salivary glands harbor more diverse microbial communities**  
713 **than gut in *Anopheles culicifacies*.** *Parasites & vectors* 2014, **7**:235.
- 714 60. Chanal A, Chapon V, Benzerara K, Barakat M, Christen R, Achouak W, Barras F, Heulin  
715 **T: The desert of Tataouine: an extreme environment that hosts a wide diversity of**  
716 **microorganisms and radiotolerant bacteria.** *Environmental Microbiology* 2006, **8**:514-  
717 525.

- 718 61. Alvarez A, Saez JM, Costa JSD, Colin VL, Fuentes MS, Cuzzo SA, Benimeli CS, Polti  
719 MA, Amoroso MJ: **Actinobacteria: current research and perspectives for**  
720 **bioremediation of pesticides and heavy metals.** *Chemosphere* 2017, **166**:41-62.
- 721 62. Anandan R, Dharumadurai D, Manogaran GP: **An introduction to actinobacteria.** In  
722 *Actinobacteria-Basics and Biotechnological Applications.* IntechOpen; 2016
- 723 63. Vos M, Velicer GJ: **Social conflict in centimeter-and global-scale populations of the**  
724 **bacterium *Myxococcus xanthus*.** *Current Biology* 2009, **19**:1763-1767.
- 725 64. Shahbaz U, Yu X: **Cloning, isolation, and characterization of novel chitinase-**  
726 **producing bacterial strain UM01 (*Myxococcus fulvus*).** *Journal of Genetic*  
727 *Engineering and Biotechnology* 2020, **18**:1-11.
- 728 65. Fatope MO, Al-Kindi SM, Abdulnour AO: **Research Trends: Natural Products as**  
729 **Pest, Microbial Disease and Tumour Control Agents.** *Sultan Qaboos University Journal*  
730 *for Science [SQUJS]* 2000, **5**:55-71.
- 731 66. Panter F, Krug D, Müller R: **Novel methoxymethacrylate natural products**  
732 **uncovered by statistics-based mining of the *myxococcus fulvus* secondary**  
733 **metabolome.** *ACS chemical biology* 2018, **14**:88-98.
- 734 67. Muturi EJ, Donthu RK, Fields CJ, Moise IK, Kim C-H: **Effect of pesticides on**  
735 **microbial communities in container aquatic habitats.** *Scientific reports* 2017, **7**:44565.
- 736 68. Johnsen K, Jacobsen CS, Torsvik V, Sørensen J: **Pesticide effects on bacterial diversity**  
737 **in agricultural soils—a review.** *Biology and Fertility of Soils* 2001, **33**:443-453.

- 738 69. Kozlova EV, Hegde S, Roundy CM, Golovko G, Saldana MA, Hart CE, Anderson ER,  
739 Hornett EA, Khanipov K, Popov VL: **Microbial interactions in the mosquito gut**  
740 **determine *Serratia* colonization and blood feeding propensity.** *bioRxiv* 2020.
- 741 70. Hegde S, Khanipov K, Albayrak L, Golovko G, Pimenova M, Saldaña MA, Rojas MM,  
742 Hornett EA, Motl GC, Fredregill CL: **Microbiome interaction networks and**  
743 **community structure from laboratory-reared and field-collected *Aedes aegypti*,**  
744 ***Aedes albopictus*, and *Culex quinquefasciatus* mosquito vectors.** *Frontiers in*  
745 *microbiology* 2018, **9**:2160.
- 746

**Fig. 1**

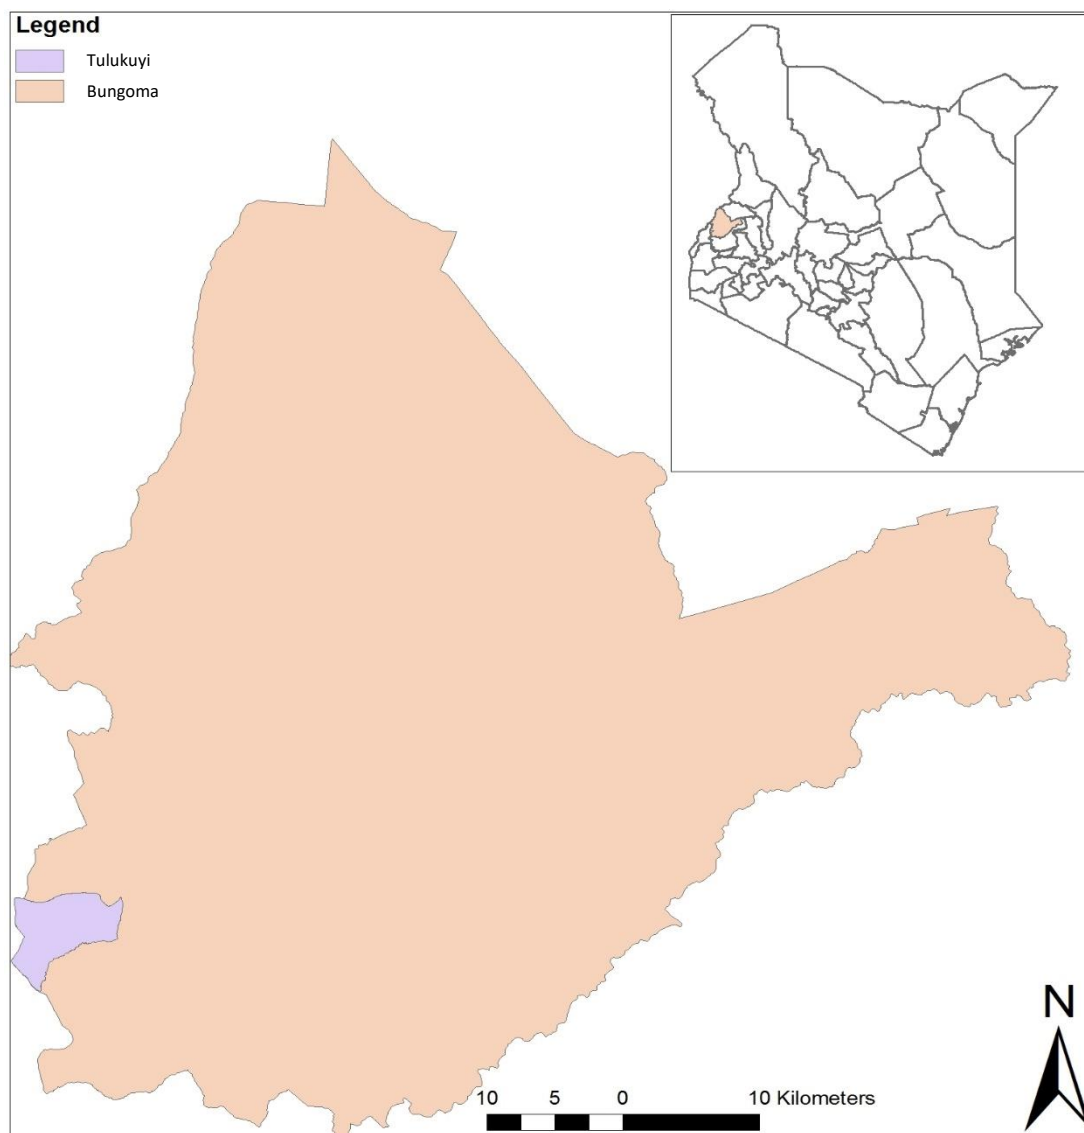



**Fig. 2**

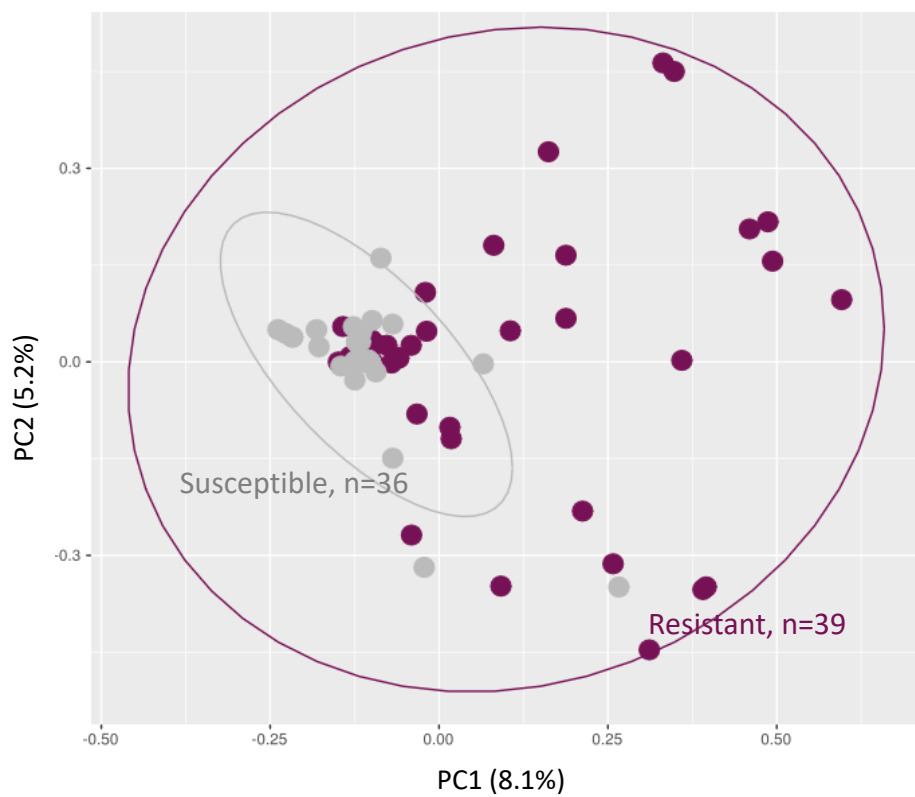

**Fig. 3**

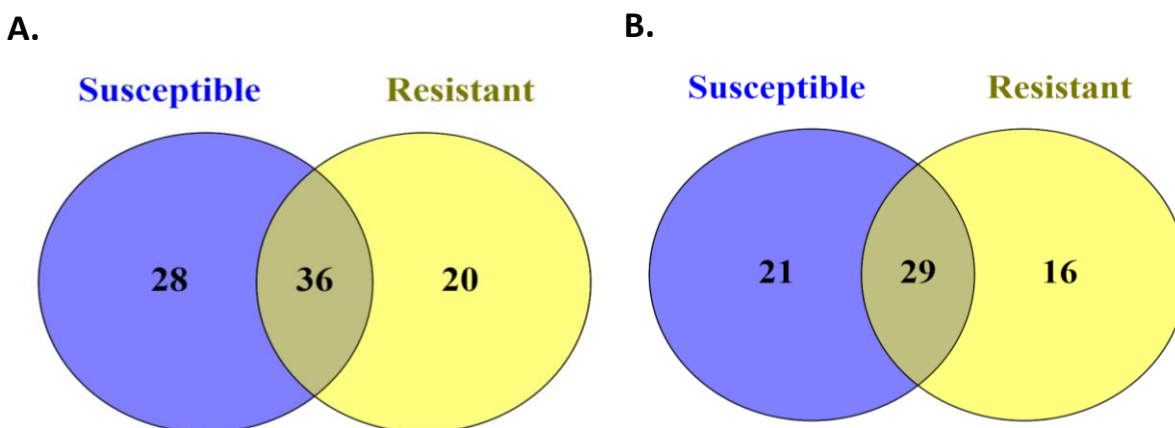

**Fig. 4**

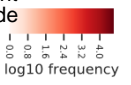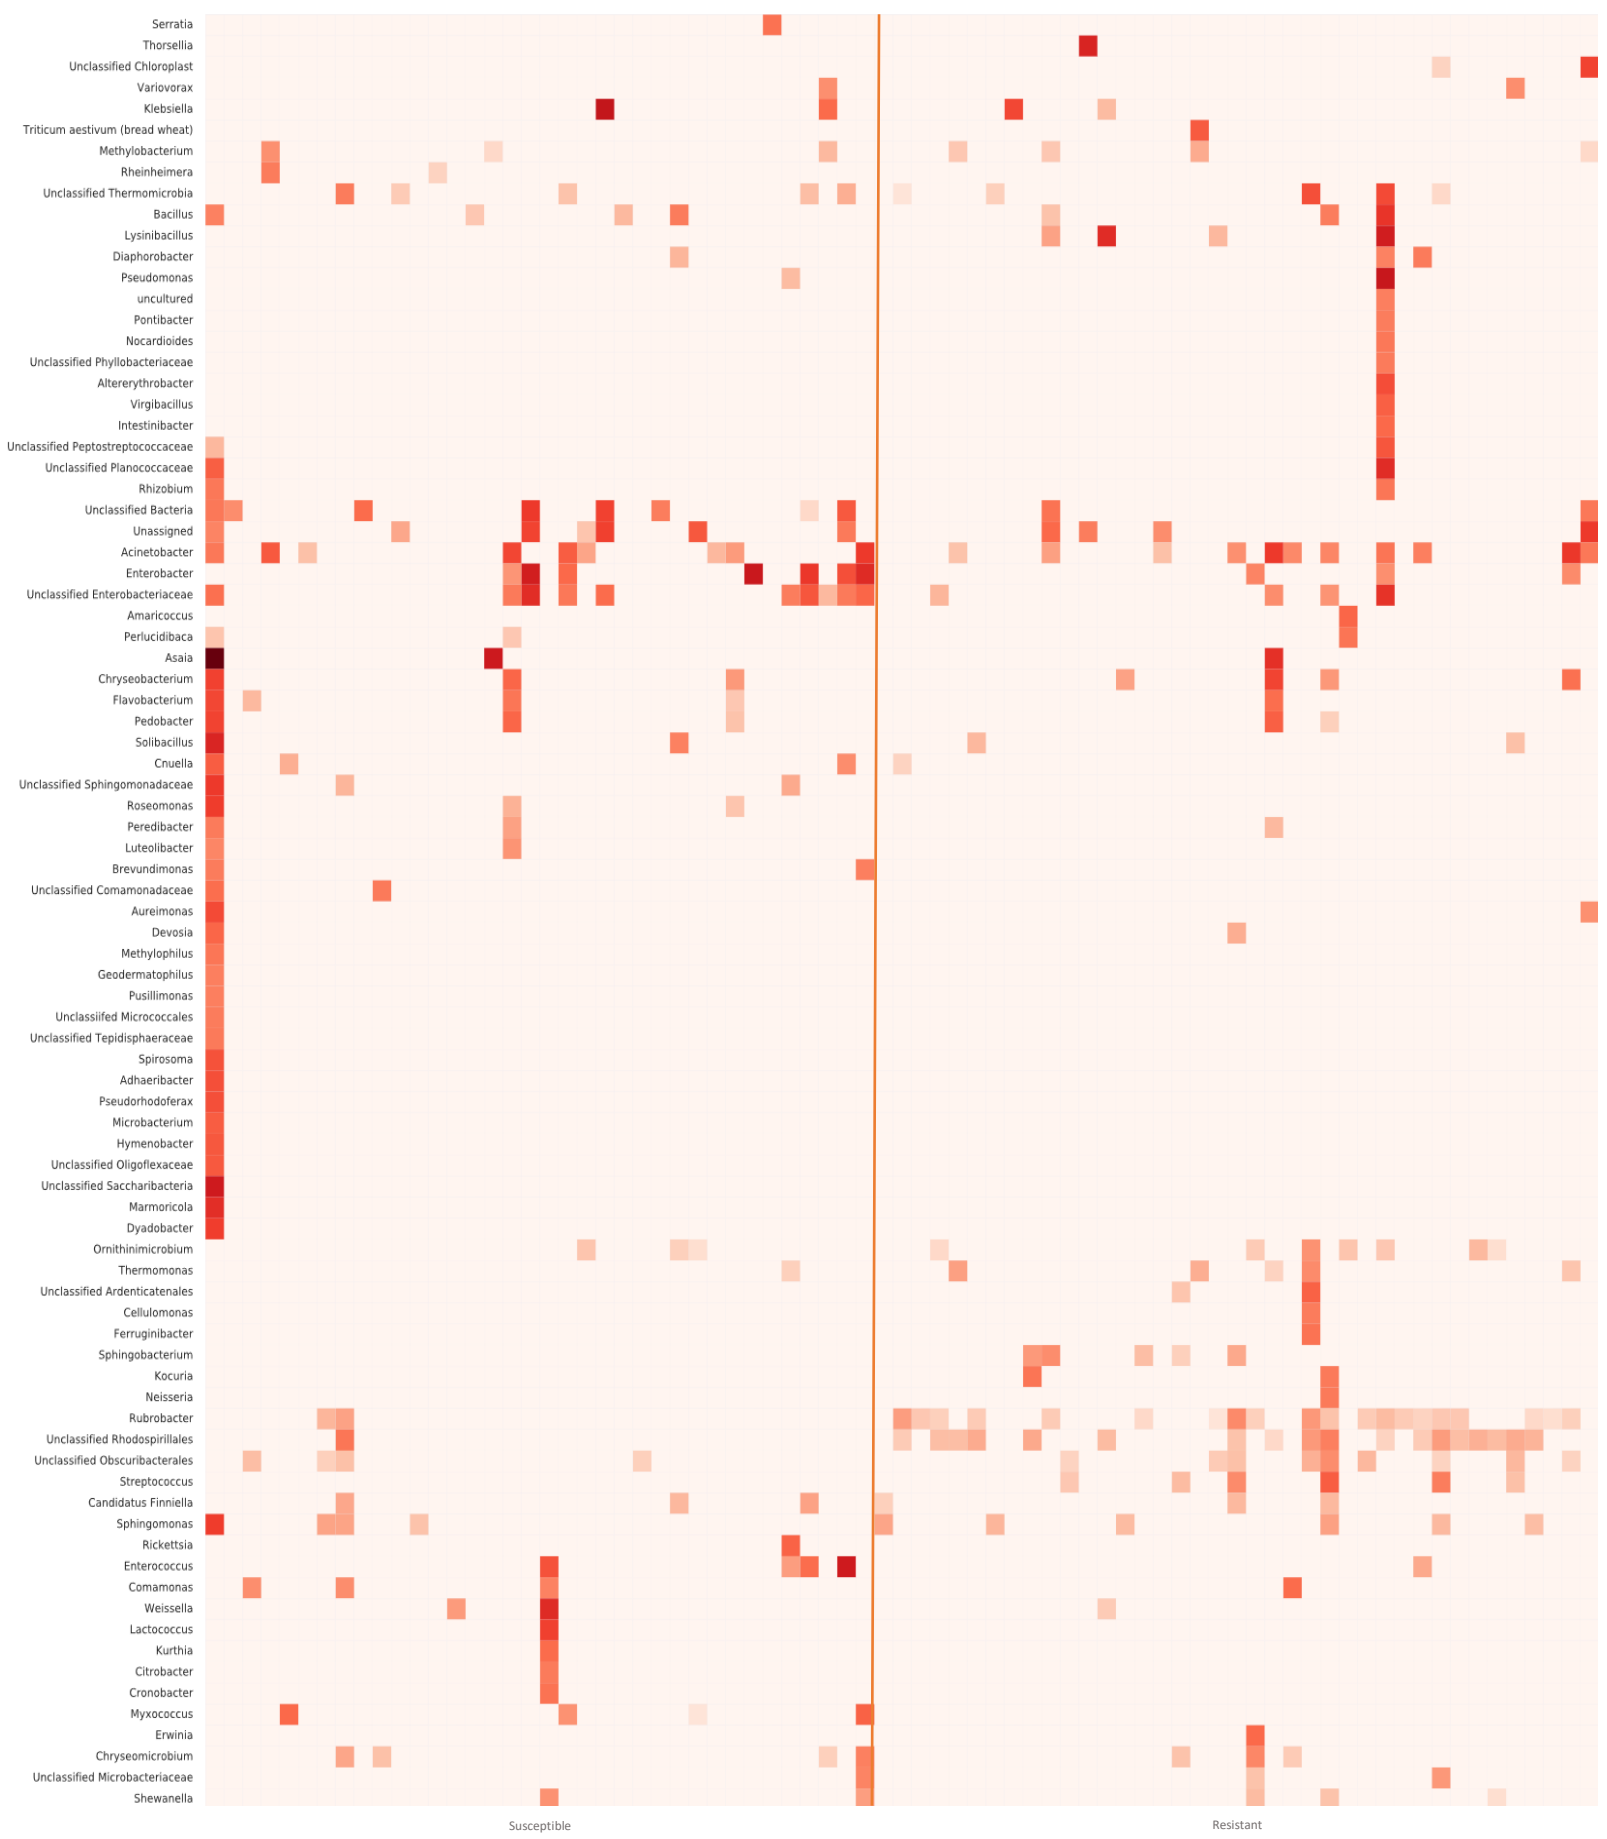

Fig. 5.

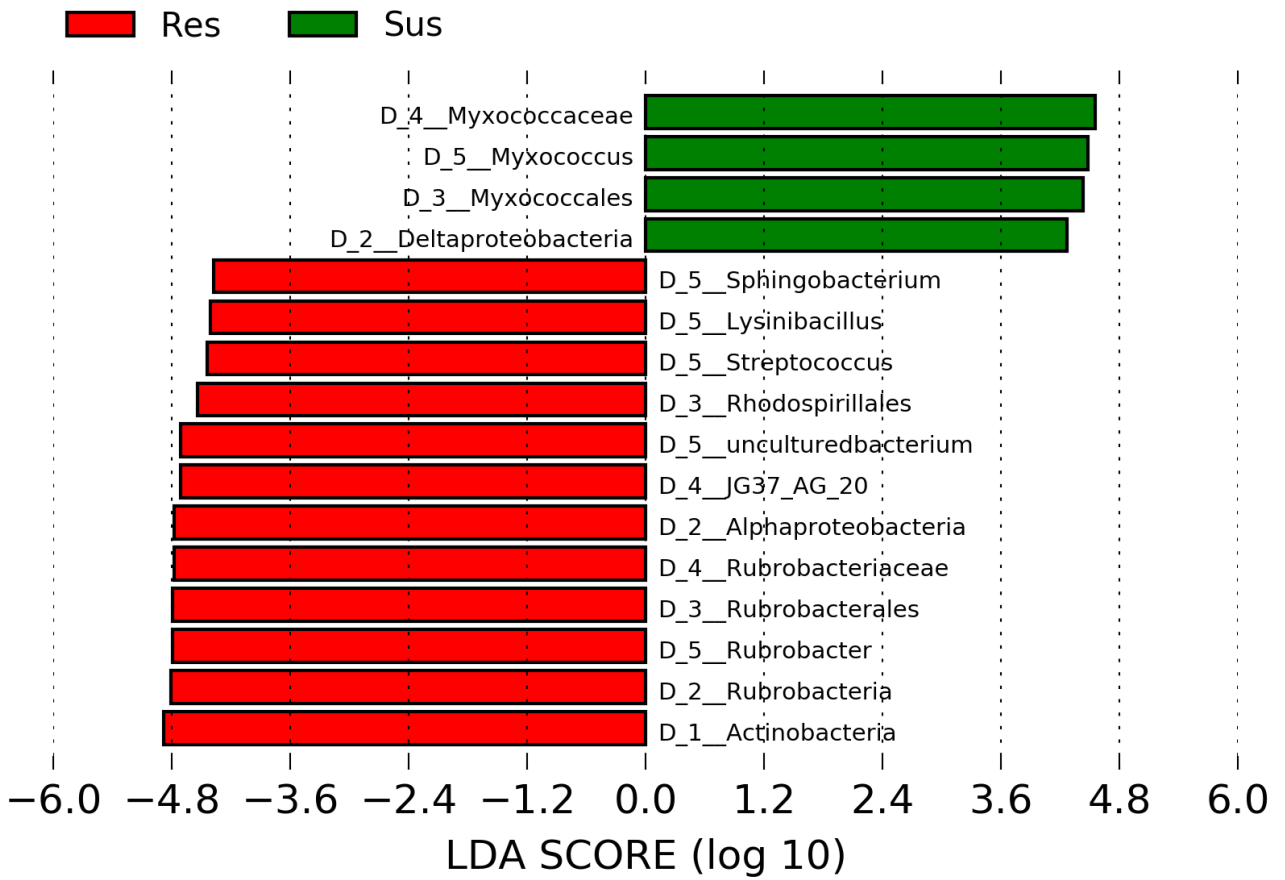

Source: https://www.biorxiv.org/content/10.1101/2020.11.12.378760v1.full.pdf
